# Supplementary material
Source: publisher site journal article supplement (https://www.dovepress.com/article/330932)
Supplement: Supplementary file 1 [file get_supplementary_file.php]

***Supplementary Table 1: Distribution Pregnant Women according to their compliance towards the recommended COVD-19 preventive Measures (n =396)***

| S.N | Items | Always  N (%) | Occasionally  N (%) | Never  N (%) |
| --- | --- | --- | --- | --- |
| 1 | Do you avoid close contact with people who are sick/ showing symptoms of respiratory disease in the past 1 week? | 51 (12.9) | 125 (31.6) | 220 (55.6) |
| 2 | Do you avoid greeting with handshaking, hugging and cheek kissing in the past 1 week? | 52 (13.1) | 167 (42.2) | 177 (44.7) |
| 3 | Did you have any travel history out of your home town in the past 1 week? 🞾🞾🞾 | 91 (23) | 110 (27.8) | 195 (49.2) |
| 4 | Did you wash your hands frequently with soap /hand sanitizers before and after contacting anyone out of your home in the past 1 week? | 38 ((9.6) | 120 (30.3) | 238 (60.1) |
| 5 | Did you avoid touching eyes, nose and mouth with unwashed hands in the past 1 week? | 24 (6.1) | 202 (51) | 170 (42.9) |
| 6 | Do you cover your mouth and nose while you are coughing or sneezing in the past 1 week? | 28 (7.1) | 113 (28.5) | 255 (64.4) |
| 7 | Have you been in any crowded place (crowded markets, churches etc.) in the past 1 week 🞾🞾🞾 | 88 (22.2) | 199 (50.3) | 109 (27.5) |
| 8 | Are you consistently using face masks when you are out of home in the past 1 week? | 26 (6.6) | 111 (28) | 259 (65.4) |
| 9 | Do you clean and disinfect frequently touched objects and surfaces regularly in the past 1 week? | 49 (12.4) | 155 (39.1) | 192 (48.5) |
| 10 | Have you stand/sit 2 meters far away from a person in the past 1 week? | 101 (25.5) | 231 (58.3) | 64 (16.2) |

🞾🞾🞾 : Reverse scored items (1= Always, 2= Occasionally 3= Never)
